# Supplementary material
Source: PubMed Central journal article supplement (PMC8087628)
Supplement: NIHMS1646099-supplement-Supplemental_Figure1.pdf [file NIHMS1646099-supplement-Supplemental_Figure1.pdf]

Supplemental Figure 1. Cytokine changes with chelation therapy for GDD and GSC patients. Healthy controls (Flu ctl) are shown for reference. Cytokines are shown in alphabetical order, one plot per cytokine. Subcaptions (e.g. a,b,c) are reset on each page.

Cytokine data were compared between time points and GDD and GSC patient using a linear mixed-effects model. The models estimated change between pre- and post-CT time points, allowing the change to differ between GDD and GSC patients, with intercept differing by patient-visit. We report p-values associated with the pre- to post-CT change for GDD patients only, and calibrate the estimated change as a percentage of the Flu control range.

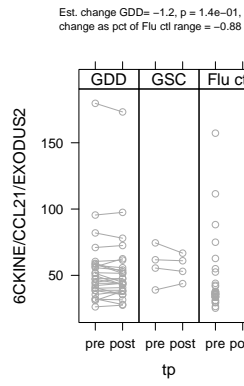

(a)

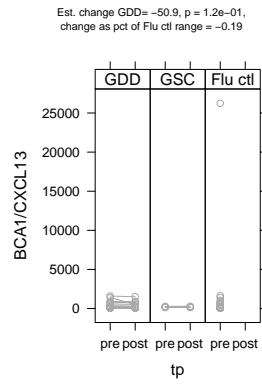

(b)

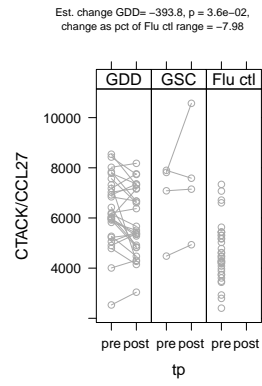

(c)

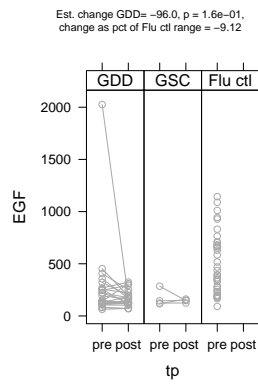

(d)

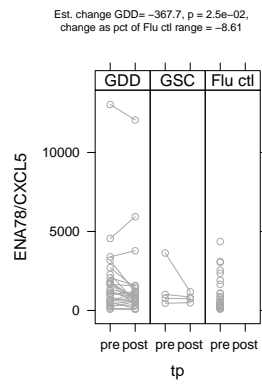

(e)

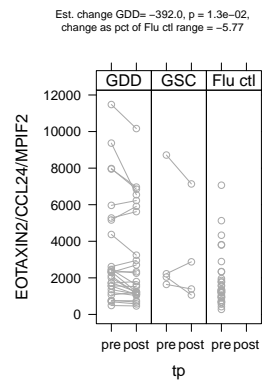

(f)

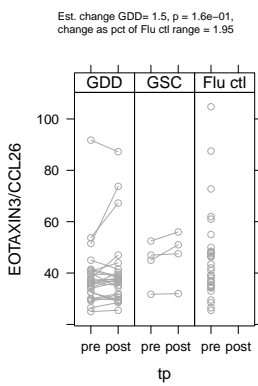

(g)

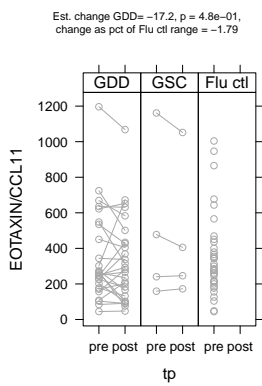

(h)

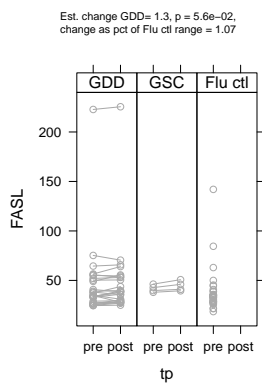

(i)

Est. change GDD= -1.8, p = 2.2e-02,  
change as pct of Flu ctl range = -4.96

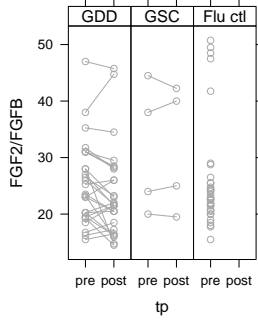

(a)

Est. change GDD= 1.7, p = 2.5e-01,  
change as pct of Flu ctl range = 4.05

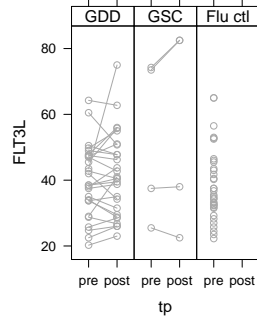

(b)

Est. change GDD= 0.2, p = 7.3e-01,  
change as pct of Flu ctl range = 0.50

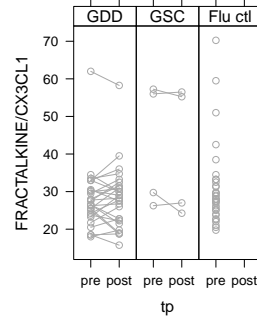

(c)

Est. change GDD= 6.2, p = 4.6e-02,  
change as pct of Flu ctl range = 3.18

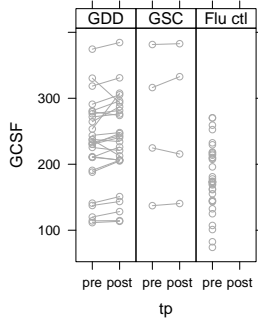

(d)

Est. change GDD= -1.6, p = 2.2e-01,  
change as pct of Flu ctl range = -1.98

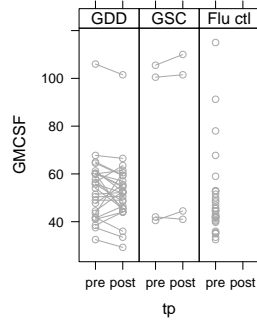

(e)

Est. change GDD= -1979.4, p = 2.4e-02,  
change as pct of Flu ctl range = -20.68

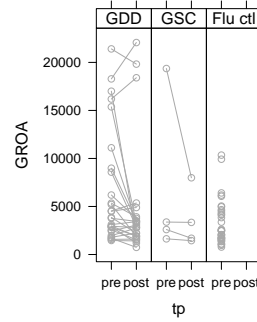

(f)

Est. change GDD= -1.0, p = 4.9e-01,  
change as pct of Flu ctl range = -2.58

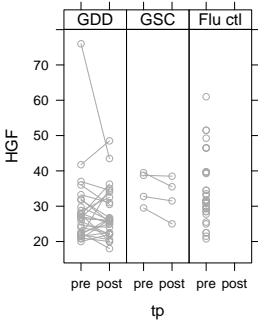

(g)

Est. change GDD= -0.0, p = 9.9e-01,  
change as pct of Flu ctl range = -0.02

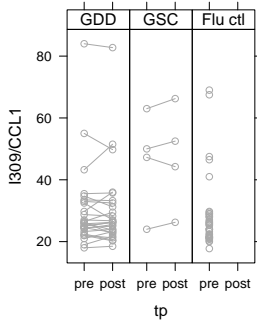

(h)

Est. change GDD= 0.3, p = 6.7e-01,  
change as pct of Flu ctl range = 0.71

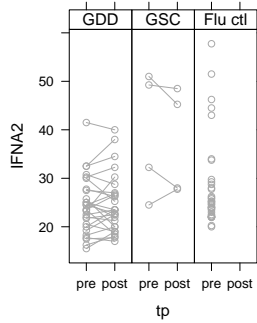

(i)

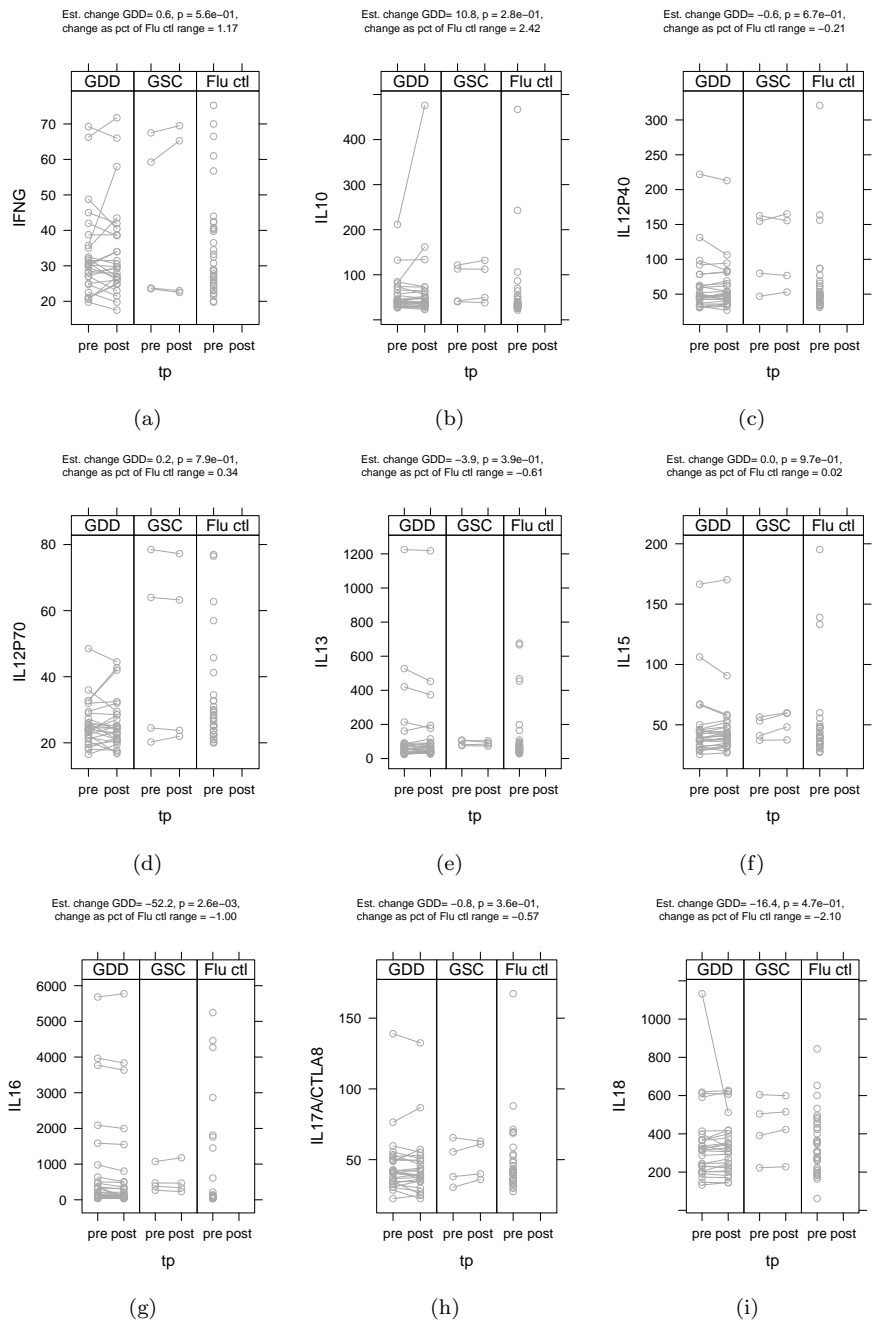

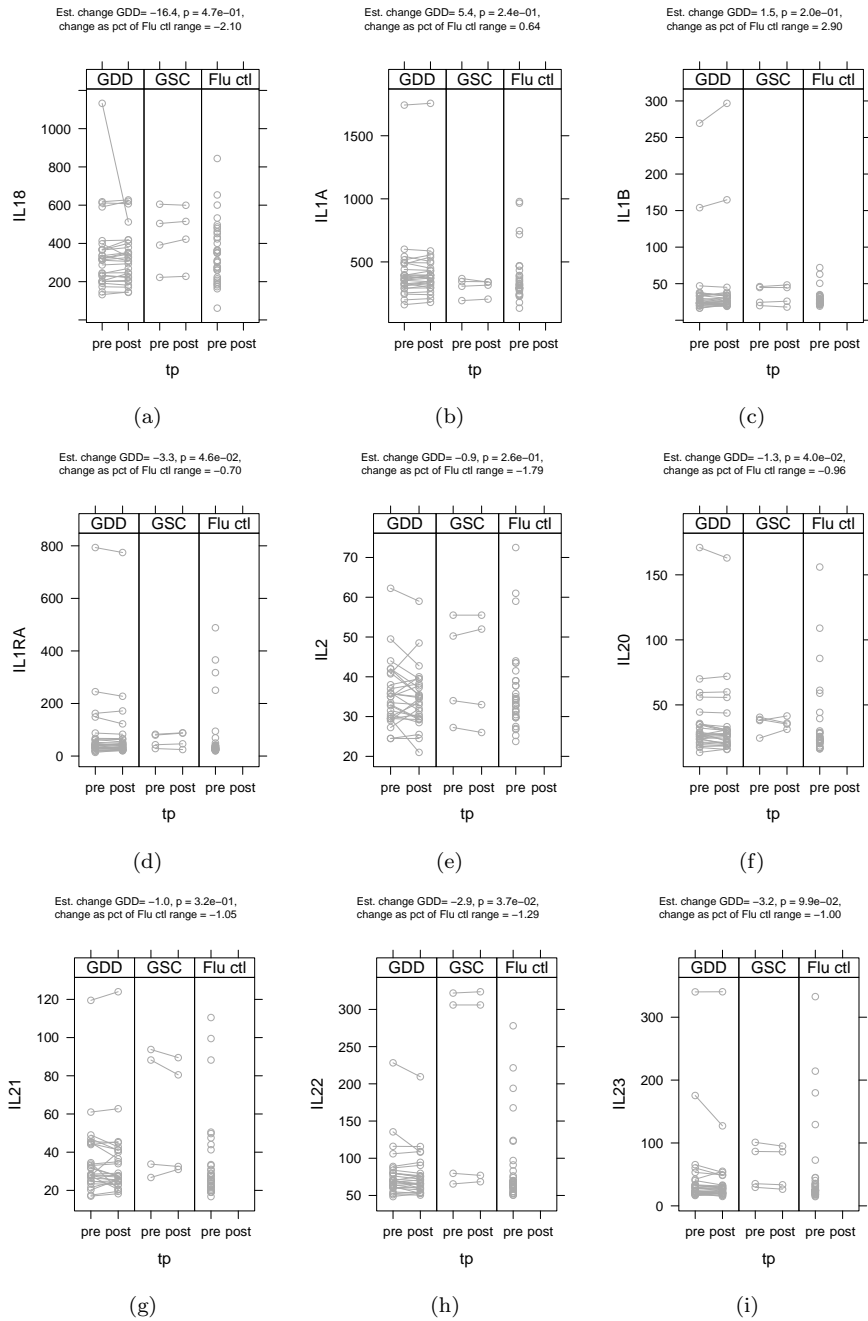

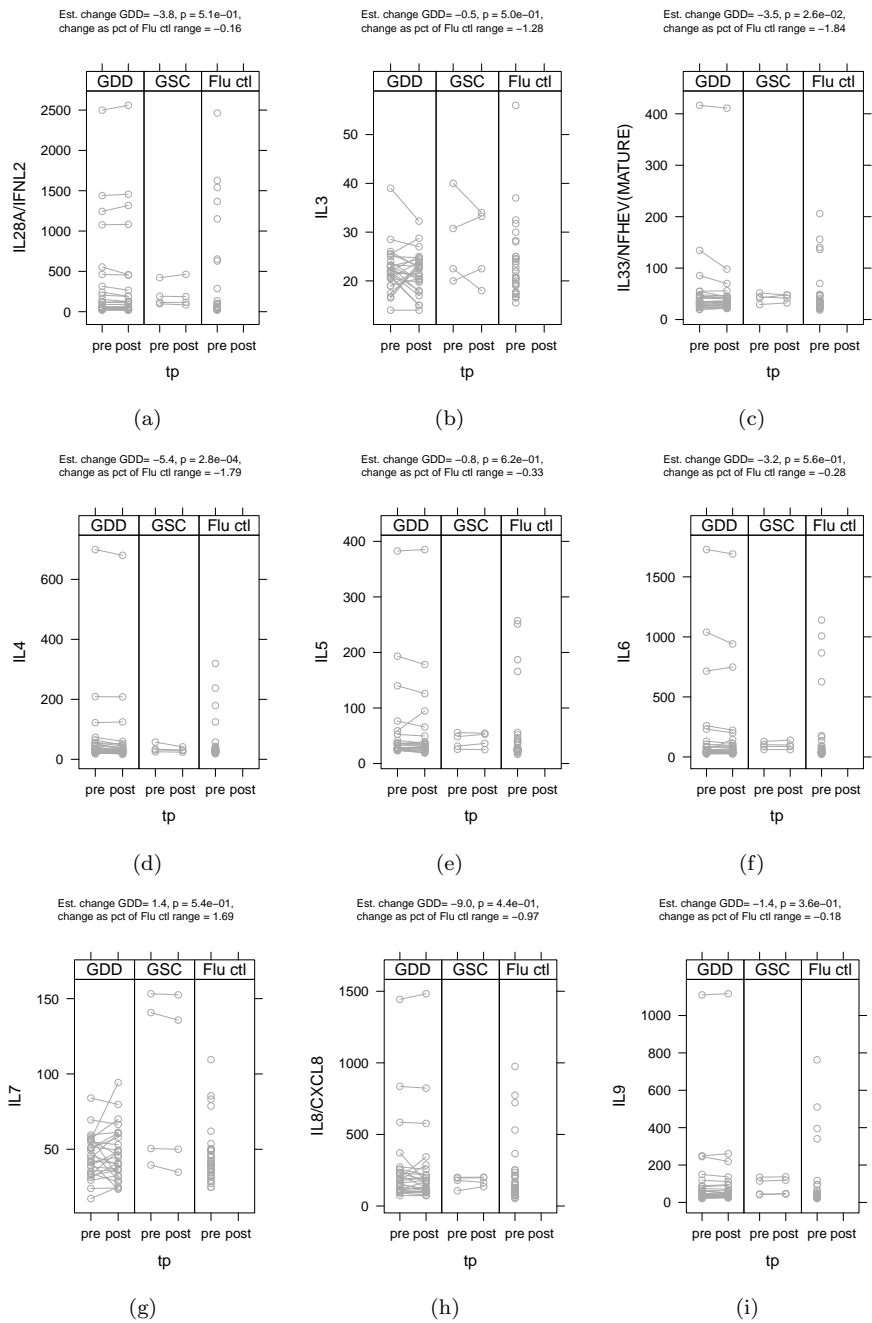

Est. change GDD= -2.9, p = 9.1e-01,  
change as pct of Flu ctl range = -0.23

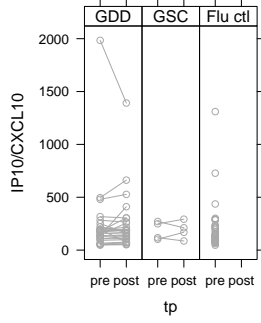

(a)

Est. change GDD= -256.1, p = 1.6e-02,  
change as pct of Flu ctl range = -6.85

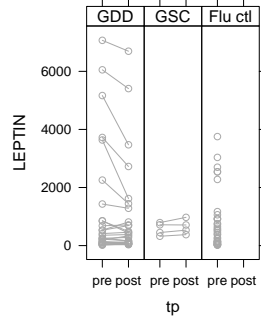

(b)

Est. change GDD= 0.0, p = 9.9e-01,  
change as pct of Flu ctl range = 0.04

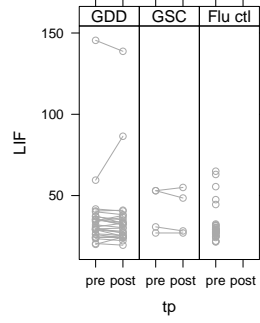

(c)

Est. change GDD= -60.1, p = 8.6e-01,  
change as pct of Flu ctl range = -0.76

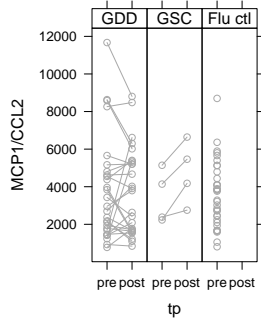

(d)

Est. change GDD= -1.5, p = 4.8e-01,  
change as pct of Flu ctl range = -0.60

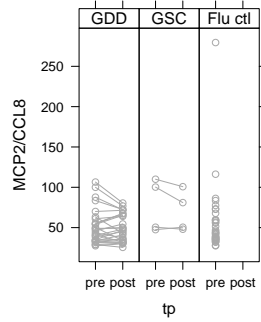

(e)

Est. change GDD= -5.2, p = 4.9e-03,  
change as pct of Flu ctl range = -0.40

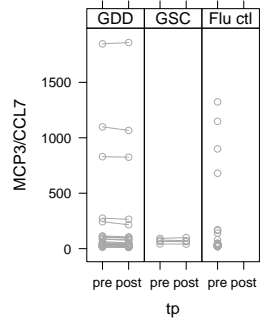

(f)

Est. change GDD= 0.4, p = 8.0e-01,  
change as pct of Flu ctl range = 0.27

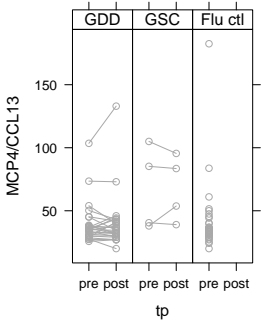

(g)

Est. change GDD= -20.9, p = 1.0e-01,  
change as pct of Flu ctl range = -2.99

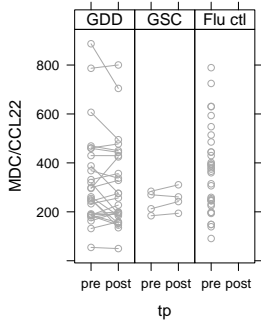

(h)

Est. change GDD= -197.0, p = 4.1e-01,  
change as pct of Flu ctl range = -80.35

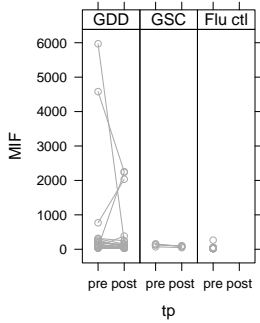

(i)

Est. change GDD= 1.9,  $p = 9.2e-01$ ,  
change as pct of Flu ctl range = 0.10

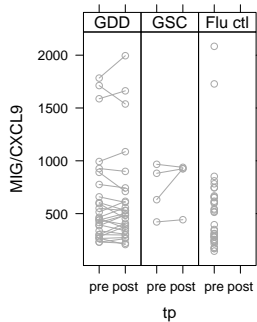

(a)

Est. change GDD= -74.2,  $p = 2.9e-01$ ,  
change as pct of Flu ctl range = -51.19

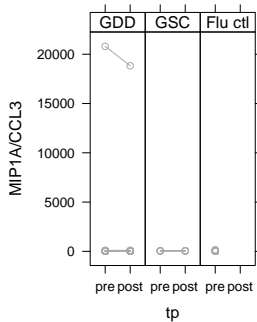

(b)

Est. change GDD= -0.5,  $p = 6.0e-01$ ,  
change as pct of Flu ctl range = -0.56

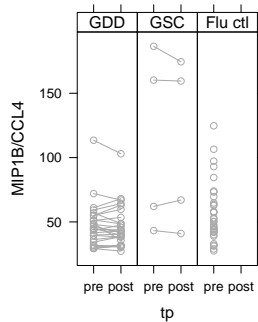

(c)

Est. change GDD= 66.8,  $p = 2.7e-01$ ,  
change as pct of Flu ctl range = 2.73

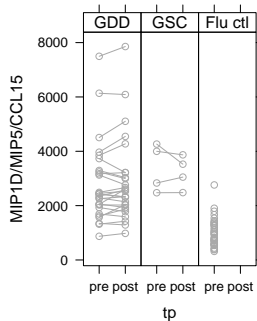

(d)

Est. change GDD= -927.7,  $p = 1.9e-01$ ,  
change as pct of Flu ctl range = -4.68

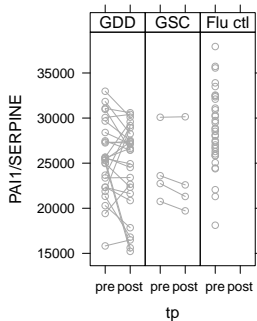

(e)

Est. change GDD= -1188.3,  $p = 1.3e-01$ ,  
change as pct of Flu ctl range = -10.43

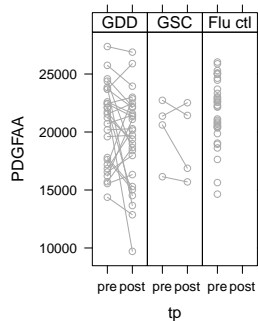

(f)

Est. change GDD= -514.0,  $p = 3.5e-01$ ,  
change as pct of Flu ctl range = -6.75

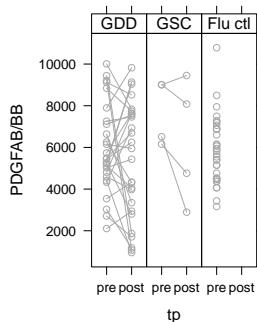

(g)

Est. change GDD= -621.3,  $p = 3.3e-02$ ,  
change as pct of Flu ctl range = -3.94

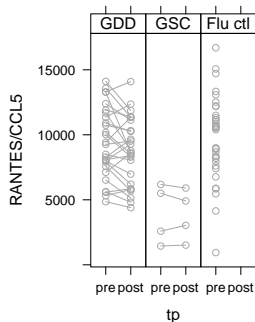

(h)

Est. change GDD= -945.7,  $p = 7.8e-03$ ,  
change as pct of Flu ctl range = -6.37

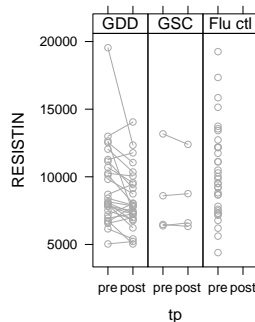

(i)



Est. change GDD= -359.9,  $p = 1.2e-01$ ,  
change as pct of Flu ctl range = -5.29

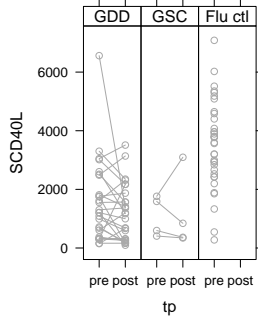

(a)

Est. change GDD= -2.4,  $p = 3.7e-01$ ,  
change as pct of Flu ctl range = -0.52

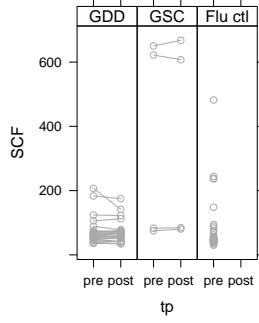

(b)

Est. change GDD= -63.3,  $p = 2.1e-01$ ,  
change as pct of Flu ctl range = -4.68

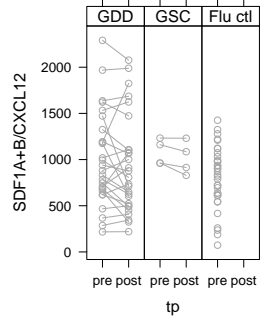

(c)

Est. change GDD= 22.1,  $p = 4.3e-03$ ,  
change as pct of Flu ctl range = 4.38

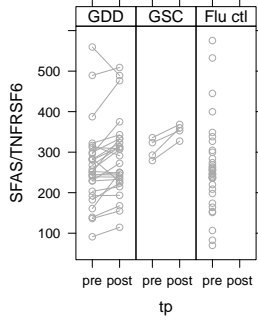

(d)

Est. change GDD= -269.6,  $p = 3.8e-04$ ,  
change as pct of Flu ctl range = -2.87

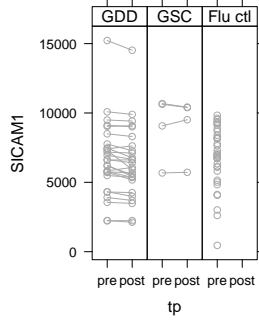

(e)

Est. change GDD= -29.8,  $p = 7.3e-01$ ,  
change as pct of Flu ctl range = -0.51

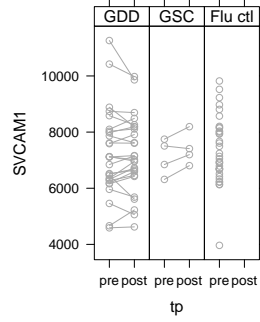

(f)

Est. change GDD= -226.5,  $p = 1.2e-01$ ,  
change as pct of Flu ctl range = -6.79

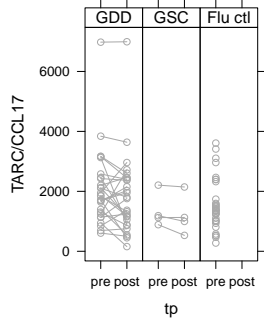

(g)

Est. change GDD= -6.6,  $p = 3.0e-02$ ,  
change as pct of Flu ctl range = -5.07

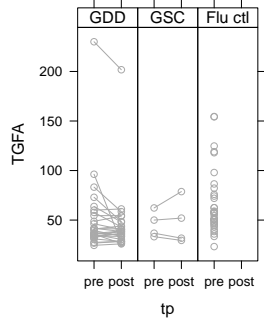

(h)

Est. change GDD= -0.4,  $p = 8.2e-01$ ,  
change as pct of Flu ctl range = -0.38

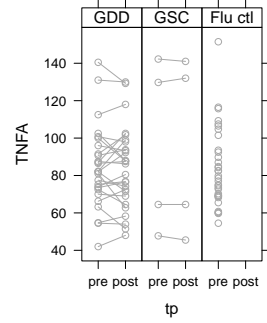

(i)

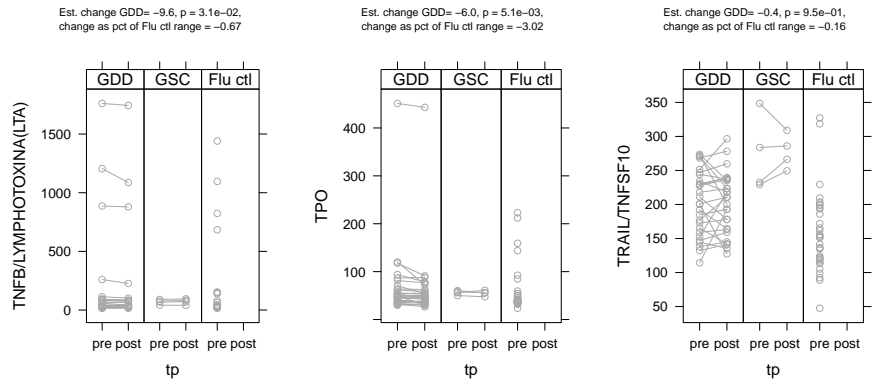

(a)

(b)

(c)

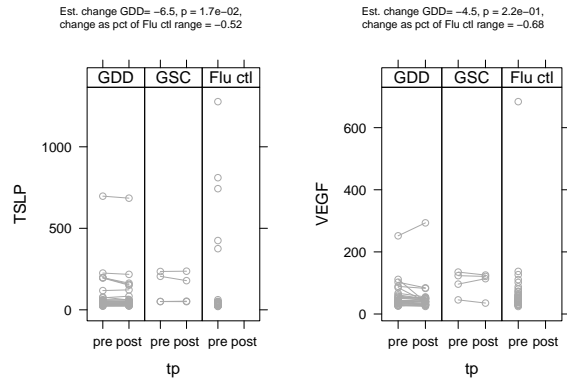

(d)

(e)
