# Supplementary material
Source: PubMed Central journal article supplement (PMC8087628)
Supplement: NIHMS1646099-supplement-Supplemental_Figure2.pdf [file NIHMS1646099-supplement-Supplemental_Figure2.pdf]

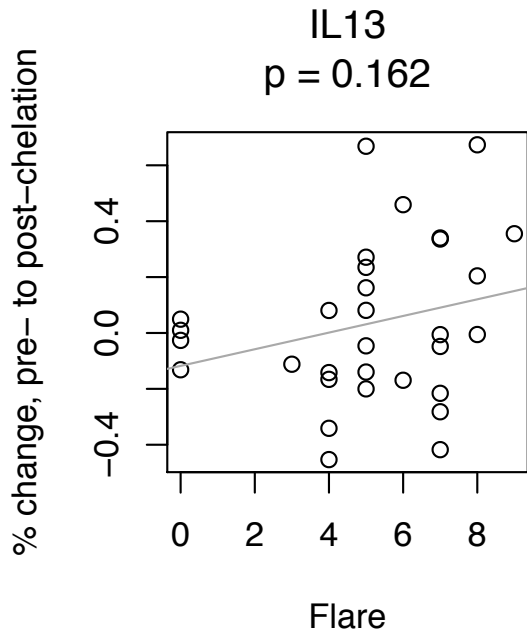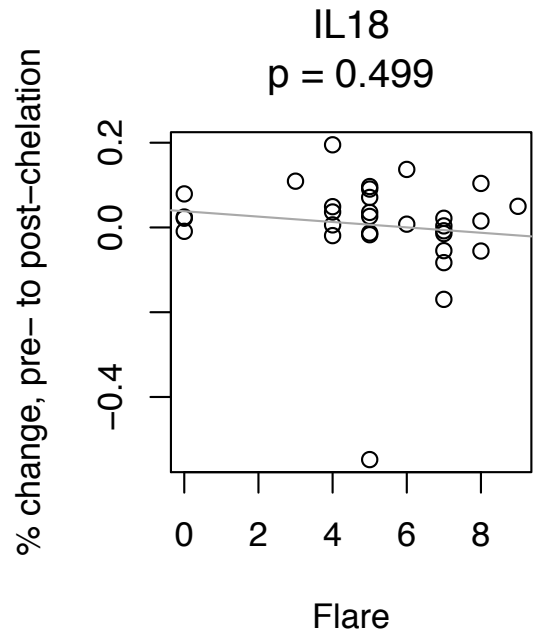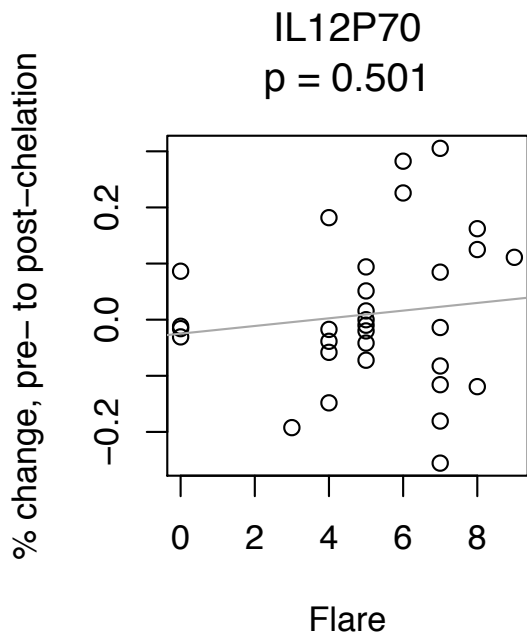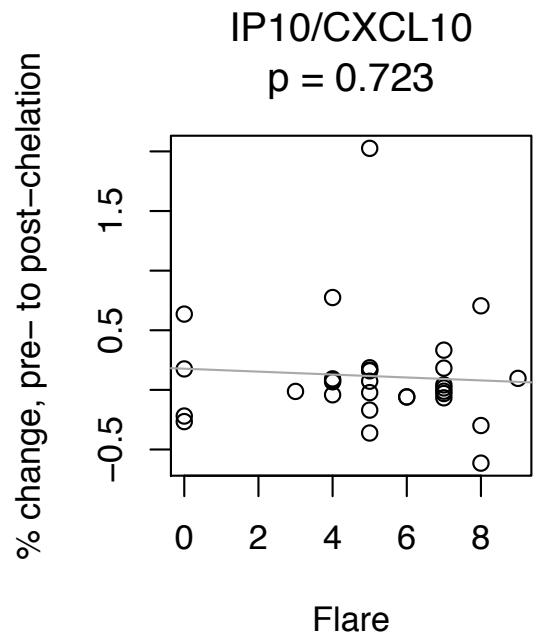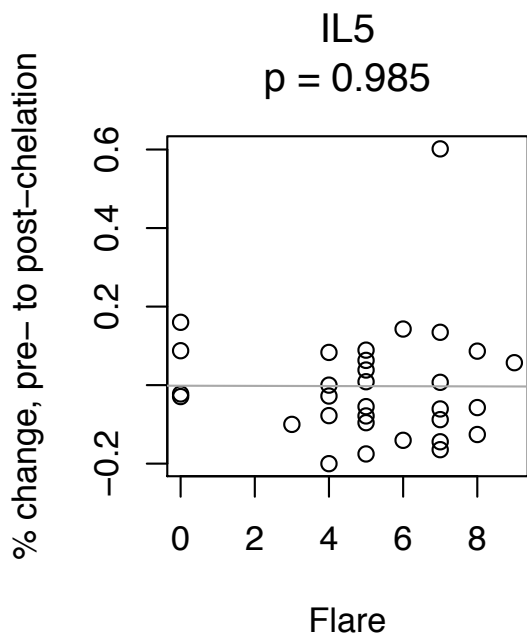

Supplementary Figure 2. Correlations of flare to percent change in cytokine, calculated as (post - pre)/pre. These data suggest that the multivariable analysis that accounts for Gd, Age, Sex, YrSinceGBCA, YrSinceOnset, and number of MRIs better accounts for the relationship between flare and cytokine than does an analysis of flare and change in cytokine levels. Graphs are ordered left to right, top to bottom by increasing p-value.
